# Supplementary material
Source: MDPI journal article supplement (https://www.mdpi.com/2073-4441/15/20/3696)

# Potentially Toxic Cyanobacteria in a Eutrophic Reservoir in Northern Colombia

## Supplementary material

**Table S1.** Mean values for physicochemical parameters evaluated during the climatic epochs of the years 2015 to 2019 in El Guájaro reservoir, Colombia.

| Year |                   | pH   |      | T (°C) |       | DO (mg/L) |      | Cond. (µS/cm) |        | DBO5 (mgO2/L) |      | TSS (mg/L) |       |
|------|-------------------|------|------|--------|-------|-----------|------|---------------|--------|---------------|------|------------|-------|
|      | Station           | Dry  | Rain | Dry    | Rain  | Dry       | Rain | Dry           | Rain   | Dry           | Rain | Dry        | Rain  |
| 2015 | LP                | 8.47 | 6.83 | 30.36  | 27.00 | 6.24      | 6.11 | 1184.67       | 642.00 | 5.71          | 6.04 | 32.00      | 33.05 |
|      | RO                | 8.03 | 6.21 | 30.23  | 28.10 | 5.61      | 5.99 | 1023.70       | 750.33 | 5.93          | 5.49 | 33.04      | 36.38 |
|      | RE                | 7.58 | 7.26 | 27.77  | 27.05 | 7.45      | 6.59 | 1108.67       | 840.00 | 4.21          | 5.72 | 21.30      | 32.93 |
|      | AC                | 7.97 | 6.23 | 31.41  | 28.57 | 5.37      | 6.55 | 789.67        | 728.67 | 4.54          | 5.08 | 21.10      | 33.39 |
|      | EP                | 8.15 | 8.31 | 30.31  | 28.18 | 5.57      | 6.09 | 857.33        | 877.33 | 4.27          | 5.04 | 19.36      | 28.93 |
|      | VR                | 7.66 | 6.43 | 29.86  | 25.23 | 6.60      | 5.93 | 544.77        | 664.00 | 3.44          | 5.97 | 13.49      | 17.27 |
|      | LC                | 7.24 | 7.29 | 30.14  | 25.29 | 4.44      | 6.22 | 1007.00       | 839.33 | 3.86          | 5.87 | 9.87       | 30.13 |
|      | <b>Mean</b>       | 7.87 | 6.94 | 30.01  | 27.06 | 5.90      | 6.21 | 930.83        | 763.10 | 4.57          | 5.60 | 21.45      | 30.30 |
|      | <b>Stand. dev</b> | 0.41 | 0.76 | 1.10   | 1.36  | 0.97      | 0.26 | 217.89        | 91.84  | 0.93          | 0.41 | 8.64       | 6.23  |
| 2016 | LP                | 8.65 | 6.13 | 30.15  | 25.61 | 4.86      | 6.22 | 1092.00       | 642.00 | 5.28          | 4.06 | 33.72      | 9.20  |
|      | RO                | 8.73 | 6.09 | 30.77  | 25.95 | 4.44      | 6.63 | 1263.33       | 345.72 | 6.64          | 3.96 | 28.08      | 15.13 |
|      | RE                | 8.10 | 7.30 | 30.11  | 26.38 | 7.35      | 7.91 | 983.00        | 632.00 | 4.99          | 3.92 | 41.47      | 24.41 |
|      | AC                | 8.30 | 7.54 | 30.93  | 26.05 | 4.22      | 5.21 | 830.00        | 838.67 | 5.72          | 3.50 | 33.63      | 16.07 |
|      | EP                | 8.53 | 8.31 | 31.14  | 27.95 | 5.62      | 5.44 | 838.00        | 805.00 | 5.17          | 3.50 | 32.47      | 16.23 |
|      | VR                | 7.73 | 6.51 | 29.76  | 26.01 | 6.07      | 6.27 | 838.00        | 360.46 | 4.25          | 3.98 | 42.84      | 16.80 |
|      | LC                | 7.49 | 7.28 | 30.95  | 25.45 | 3.63      | 6.07 | 736.33        | 644.00 | 4.15          | 4.11 | 48.00      | 9.69  |
|      | <b>Mean</b>       | 8.22 | 7.03 | 30.55  | 26.20 | 5.17      | 6.25 | 940.10        | 609.69 | 5.17          | 3.86 | 37.17      | 15.36 |
|      | <b>Stand. dev</b> | 0.47 | 0.82 | 0.53   | 0.83  | 1.27      | 0.88 | 184.34        | 193.69 | 0.86          | 0.26 | 7.04       | 5.09  |
| 2017 | LP                | 8.39 | 8.59 | 31.35  | 30.60 | 6.04      | 6.92 | 1089.00       | 918.00 | 5.68          | 5.87 | 34.13      | 35.45 |
|      | RO                | 7.06 | 9.05 | 28.26  | 30.47 | 3.56      | 6.81 | 410.02        | 729.00 | 4.18          | 4.79 | 10.27      | 28.72 |
|      | RE                | 7.22 | 9.23 | 27.98  | 31.13 | 4.37      | 6.68 | 303.39        | 727.33 | 3.86          | 5.33 | 16.67      | 28.49 |
|      | AC                | 7.18 | 9.18 | 28.52  | 30.13 | 3.60      | 6.42 | 410.13        | 734.67 | 4.18          | 4.98 | 9.03       | 28.54 |
|      | EP                | 7.15 | 9.10 | 28.59  | 29.87 | 3.59      | 6.06 | 410.33        | 734.67 | 4.15          | 4.88 | 10.37      | 27.38 |
|      | VR                | 7.77 | 7.81 | 28.36  | 30.17 | 6.56      | 5.83 | 217.55        | 881.33 | 3.91          | 3.10 | 23.07      | 28.00 |
|      | LC                | 7.53 | 8.40 | 28.41  | 30.17 | 5.30      | 4.72 | 172.21        | 889.67 | 4.06          | 3.01 | 8.53       | 28.23 |
|      | <b>Mean</b>       | 7.47 | 8.77 | 28.78  | 30.36 | 4.72      | 6.21 | 430.38        | 802.10 | 4.29          | 4.57 | 16.01      | 29.26 |
|      | <b>Stand. dev</b> | 0.41 | 0.76 | 1.10   | 1.36  | 0.97      | 0.26 | 217.89        | 91.84  | 0.93          | 0.41 | 8.64       | 6.23  |

|      |                        |      |      |       |       |      |      |         |         |      |      |       |       |
|------|------------------------|------|------|-------|-------|------|------|---------|---------|------|------|-------|-------|
|      | <b>Stand.<br/>dev</b>  | 0.48 | 0.53 | 1.15  | 0.42  | 1.26 | 0.77 | 306.34  | 88.89   | 0.63 | 1.09 | 9.56  | 2.77  |
| 2018 | LP                     | 8.77 | 8.88 | 31.23 | 30.62 | 5.84 | 5.19 | 1072.33 | 1147.33 | 5.56 | 2.58 | 32.70 | 16.02 |
|      | RO                     | 8.79 | 8.37 | 29.75 | 30.62 | 4.49 | 5.42 | 1080.33 | 827.00  | 3.64 | 2.69 | 15.67 | 23.93 |
|      | RE                     | 6.46 | 8.60 | 29.97 | 30.13 | 4.02 | 5.59 | 426.42  | 556.00  | 3.91 | 2.80 | 14.93 | 27.03 |
|      | AC                     | 7.41 | 8.31 | 30.70 | 30.34 | 3.60 | 5.42 | 418.50  | 828.67  | 4.00 | 2.59 | 8.49  | 23.83 |
|      | EP                     | 7.17 | 8.41 | 29.56 | 30.24 | 3.52 | 5.13 | 430.15  | 817.00  | 4.37 | 2.48 | 10.78 | 23.76 |
|      | VR                     | 7.81 | 8.07 | 30.71 | 30.14 | 6.62 | 5.52 | 226.06  | 562.33  | 3.92 | 2.98 | 25.31 | 28.10 |
|      | LC                     | 6.90 | 7.52 | 32.10 | 31.15 | 5.06 | 3.50 | 181.44  | 324.67  | 4.13 | 2.41 | 8.75  | 28.37 |
|      | <b>Mean</b>            | 7.62 | 8.31 | 30.58 | 30.46 | 4.74 | 5.11 | 547.89  | 723.29  | 4.22 | 2.65 | 16.66 | 24.44 |
|      | <b>Stand.<br/>Dev.</b> | 0.90 | 0.43 | 0.90  | 0.37  | 1.17 | 0.73 | 374.56  | 265.60  | 0.63 | 0.19 | 9.13  | 4.23  |
| 2019 | LP                     | 8.53 | 8.93 | 29.42 | 33.80 | 5.36 | 4.08 | 1012.70 | 1138.33 | 5.75 | 2.68 | 28.27 | 16.33 |
|      | RO                     | 8.30 | 8.46 | 30.08 | 33.58 | 5.20 | 4.54 | 1034.66 | 840.33  | 5.88 | 2.59 | 43.10 | 23.83 |
|      | RE                     | 7.80 | 8.06 | 30.24 | 32.27 | 4.60 | 5.51 | 969.06  | 559.00  | 6.45 | 2.29 | 28.86 | 27.60 |
|      | AC                     | 7.76 | 8.44 | 31.16 | 33.63 | 4.35 | 5.42 | 529.61  | 821.67  | 5.59 | 2.73 | 28.01 | 23.83 |
|      | EP                     | 7.72 | 8.35 | 30.12 | 33.61 | 4.85 | 5.35 | 500.99  | 829.00  | 5.52 | 2.75 | 28.33 | 21.43 |
|      | VR                     | 8.08 | 8.55 | 30.48 | 30.13 | 4.34 | 5.65 | 564.91  | 560.67  | 7.26 | 2.90 | 43.10 | 28.00 |
|      | LC                     | 7.62 | 7.86 | 31.28 | 32.57 | 4.21 | 3.22 | 499.11  | 292.67  | 4.99 | 2.34 | 41.11 | 18.67 |
|      | <b>Mean</b>            | 7.97 | 8.38 | 30.40 | 32.80 | 4.70 | 4.82 | 730.15  | 720.24  | 5.92 | 2.61 | 34.40 | 21.81 |
|      | <b>Stand.<br/>dev</b>  | 0.34 | 0.34 | 0.65  | 1.32  | 0.45 | 0.91 | 259.18  | 272.53  | 0.73 | 0.22 | 7.55  | 4.34  |

**Table S2.** Abundance and species richness of cyanobacteria present in El Guájaro reservoir. found from 2015 to 2019.

| Richness<br>(Number of species) |        |        |        |        |        |        |        |        |        |        |
|---------------------------------|--------|--------|--------|--------|--------|--------|--------|--------|--------|--------|
| Station                         | 2015   |        | 2016   |        | 2017   |        | 2018   |        | 2019   |        |
|                                 | Season |        | Season |        | Season |        | Season |        | Season |        |
|                                 | Dry    | Rain   |
| LP                              | 9      | 8      | 10     | 12     | 13     | 11     | 11     | 11     | 11     | 10     |
| RO                              | 11     | 9      | 10     | 9      | 10     | 10     | 11     | 12     | 7      | 10     |
| RE                              | 14     | 9      | 17     | 12     | 14     | 10     | 15     | 12     | 9      | 12     |
| AC                              | 12     | 8      | 14     | 13     | 12     | 12     | 14     | 11     | 16     | 12     |
| EP                              | 6      | 6      | 10     | 12     | 10     | 9      | 13     | 9      | 13     | 10     |
| VR                              | 10     | 7      | 8      | 11     | 6      | 11     | 8      | 11     | 12     | 13     |
| LC                              | 12     | 8      | 14     | 13     | 6      | 10     | 8      | 9      | 10     | 13     |
| <b>Mean</b>                     | 10.57  | 7.86   | 11.86  | 11.71  | 10.14  | 10.43  | 11.43  | 10.71  | 11.14  | 11.43  |
| <b>Stand. dev</b>               | 2.57   | 1.07   | 3.18   | 1.38   | 3.18   | 0.98   | 2.76   | 1.25   | 2.91   | 1.39   |
| <b>Conf. Intv.</b>              | 1.91   | 0.79   | 2.36   | 1.02   | 2.36   | 0.72   | 2.04   | 0.93   | 2.16   | 1.03   |
| Abundance<br>(Cell/mL)          |        |        |        |        |        |        |        |        |        |        |
| Station                         | Season |        |
|                                 | 2015   |        | 2016   |        | 2017   |        | 2018   |        | 2019   |        |
|                                 | Dry    | Rain   |
| LP                              | 492    | 179    | 117    | 351    | 165    | 253    | 122    | 186    | 256    | 152    |
| RO                              | 496    | 176    | 184    | 270    | 96     | 240    | 186    | 238    | 248    | 270    |
| RE                              | 828    | 203    | 225    | 385    | 117    | 225    | 204    | 295    | 230    | 225    |
| AC                              | 609    | 146    | 197    | 185    | 96     | 165    | 109    | 193    | 188    | 152    |
| EP                              | 306    | 121    | 193    | 220    | 76     | 185    | 121    | 104    | 139    | 130    |
| VR                              | 550    | 161    | 104    | 230    | 73     | 218    | 69     | 189    | 159    | 225    |
| LC                              | 500    | 179    | 316    | 476    | 73     | 262    | 94     | 239    | 142    | 217    |
| <b>Mean</b>                     | 540.14 | 166.43 | 190.86 | 302.43 | 99.43  | 221.14 | 129.29 | 206.29 | 194.57 | 195.86 |
| <b>Stand. dev</b>               | 157.27 | 26.63  | 70.61  | 105.03 | 33.11  | 35.41  | 48.67  | 59.57  | 50.07  | 51.36  |
| <b>Conf. Intv.</b>              | 116.50 | 19.73  | 52.31  | 77.80  | 24.53  | 26.23  | 36.05  | 44.13  | 37.09  | 38.05  |
| <b>Total abundance</b>          | 4946   |        | 3453   |        | 2244   |        | 2349   |        | 2733   |        |

**Figure S1.** Microphotographs of natural samples collected in El Guájaro reservoir during the period 2015-2019. (a-b) *Microcystis aeruginosa*. (c) *Synechocystis* sp. (d) *Merismopedia* sp. (e) *Nostoc* sp. (f) *Nostoc commune*. (g) *Nostoc muscorum* colony. (h) *Spirulina* sp. (i) *Phormidium* sp. (j) *Phormidium papyraceum*. (k) *Oscillatoria tenuis*? (l) *Planktothrix agardii*. (m) *Pseudanabaena catenata*. (n) *Raphidiopsis raciborskii*. (o) *Dolichospermum flos-aquae*. (p) *Stigonema* sp. (q) *Cylindrospermum* sp. (r) *Raphidiopsis curvata*. (s) *Leptolyngbya* sp. (t) *Anabaena* sp. (u) *Calothrix* sp.

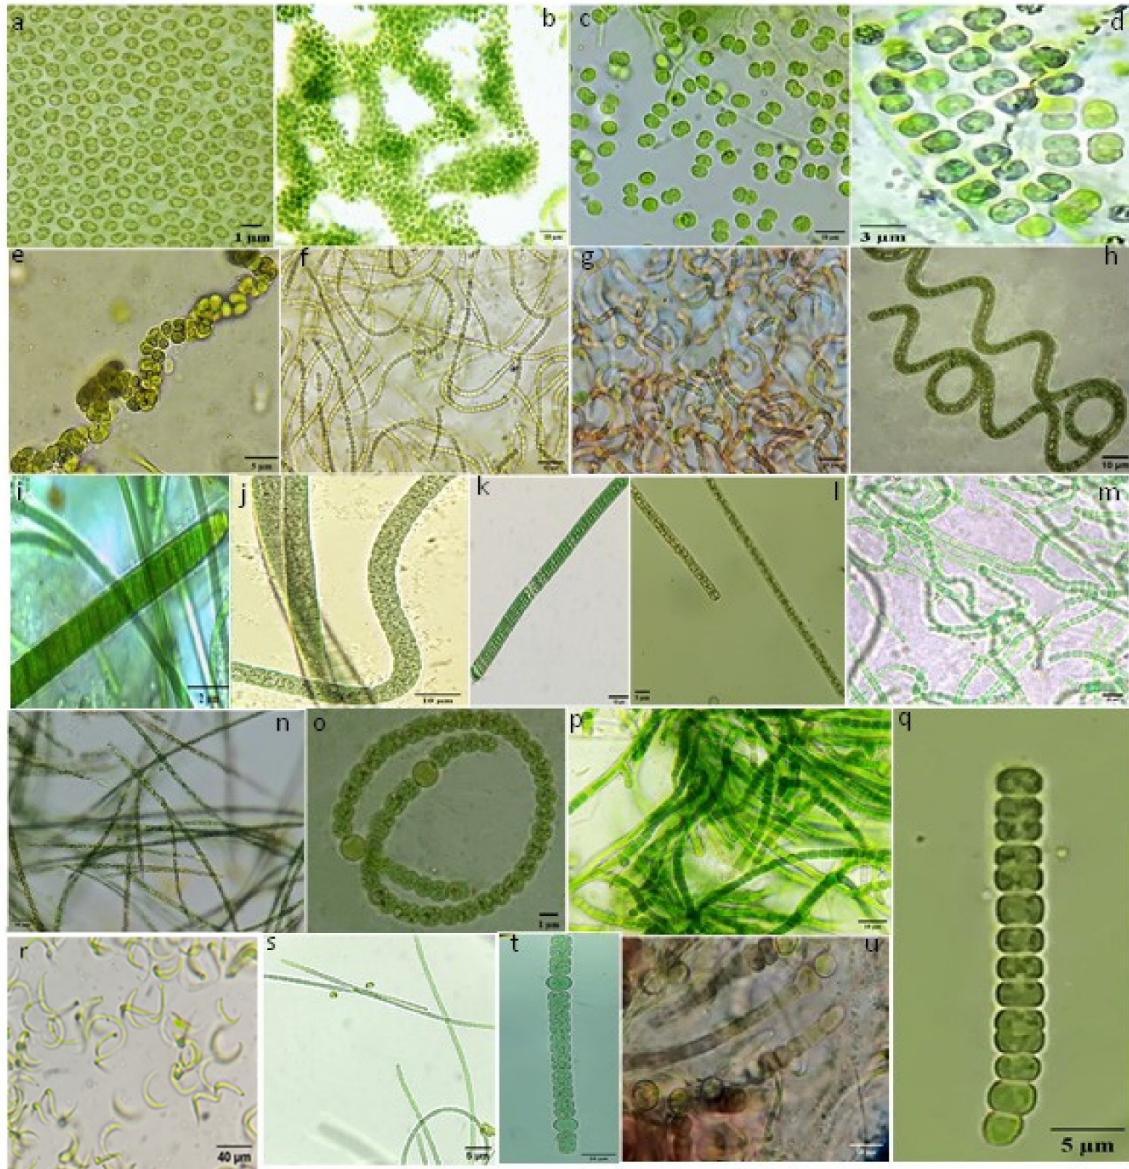

**Figure S2.** NMDS non-metric multidimensional scaling analysis of the cyanobacterial community with interaction between significant environmental variables and confidence ellipses of climatic epochs.

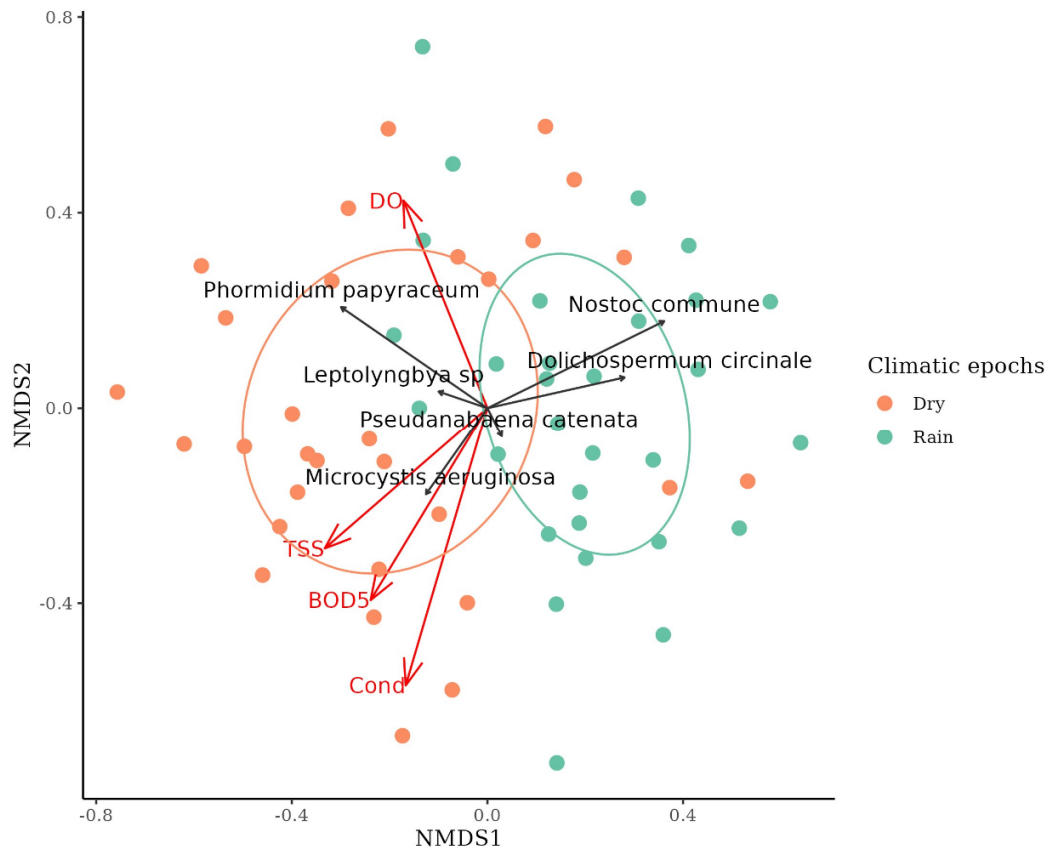

Supplement: s1 [file s1]
